# Supplementary material for: Quercetin ameliorates neuroinflammatory and neurodegenerative biomarkers in the brain and improves neurobehavioral parameters in a repeated intranasal amyloid-beta exposed model of Alzheimer's disease
Source: Royal Society of Chemistry journal article supplement (doi:10.1039/d4fo02602k), 2024-01-01
Supplement: d4fo02602k1.pdf [file d4fo02602k1.pdf]

## SUPPLEMENTARY DATA

**TITLE: Quercetin ameliorates neuroinflammatory and neurodegenerative biomarkers in brain and improves neurobehavioral parameters in repeated intranasal amyloid-beta exposed model of Alzheimer's disease**

### Phosphorylated-Tau (S199)

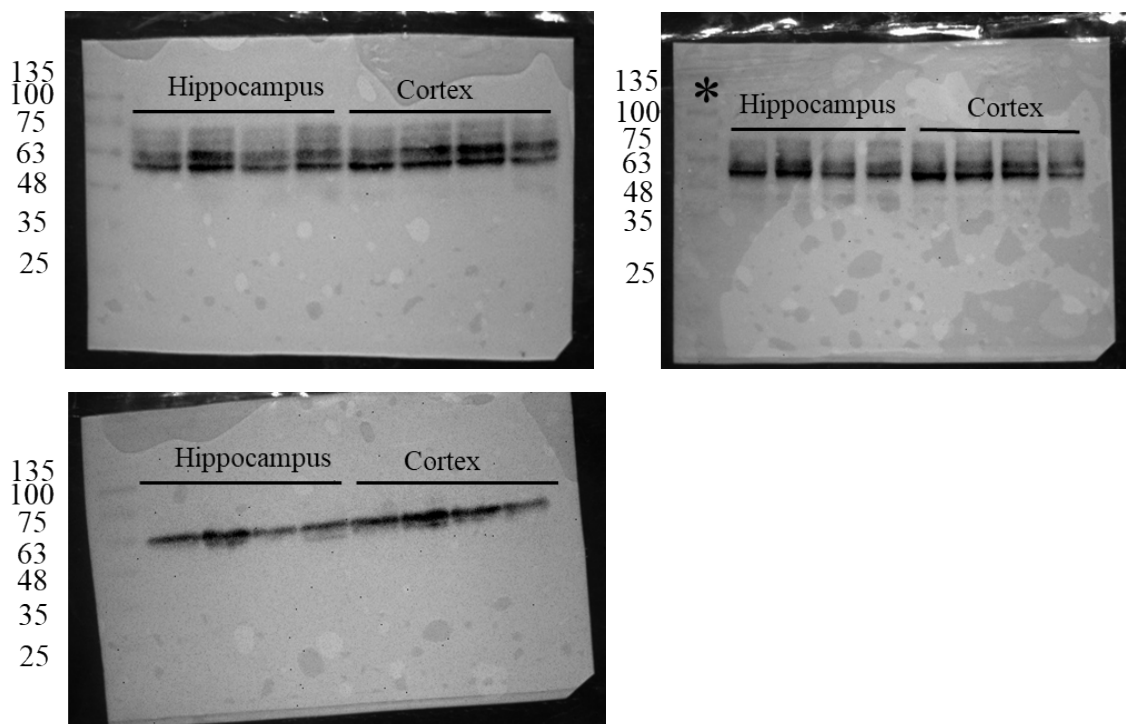

**Fig. 1** Effect of oral treatment with quercetin on the expression of p-Tau in hippocampus and cortex of Aβ<sub>1-42</sub>-exposed mouse. p-Tau: phosphorylated tau.

## Total tau

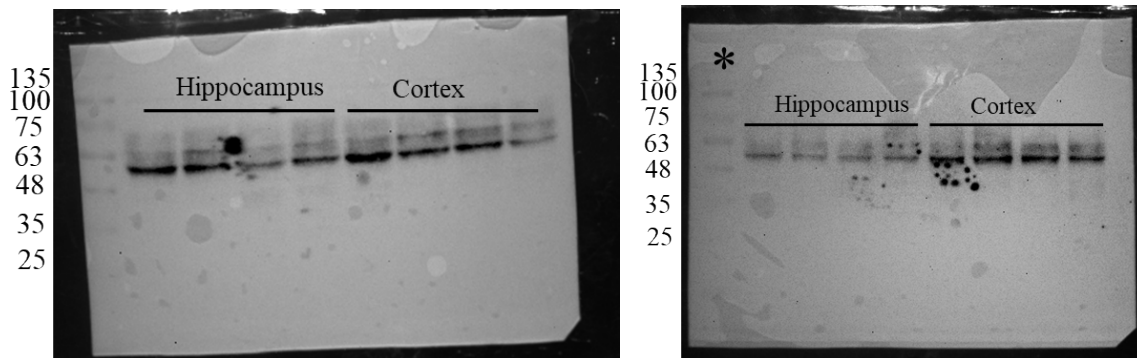

**Fig. 2** Effect of oral treatment with quercetin on the expression of total-tau in hippocampus and cortex of  $A\beta_{1-42}$ -exposed mouse.

\* Representative blots used in manuscript

## BACE1

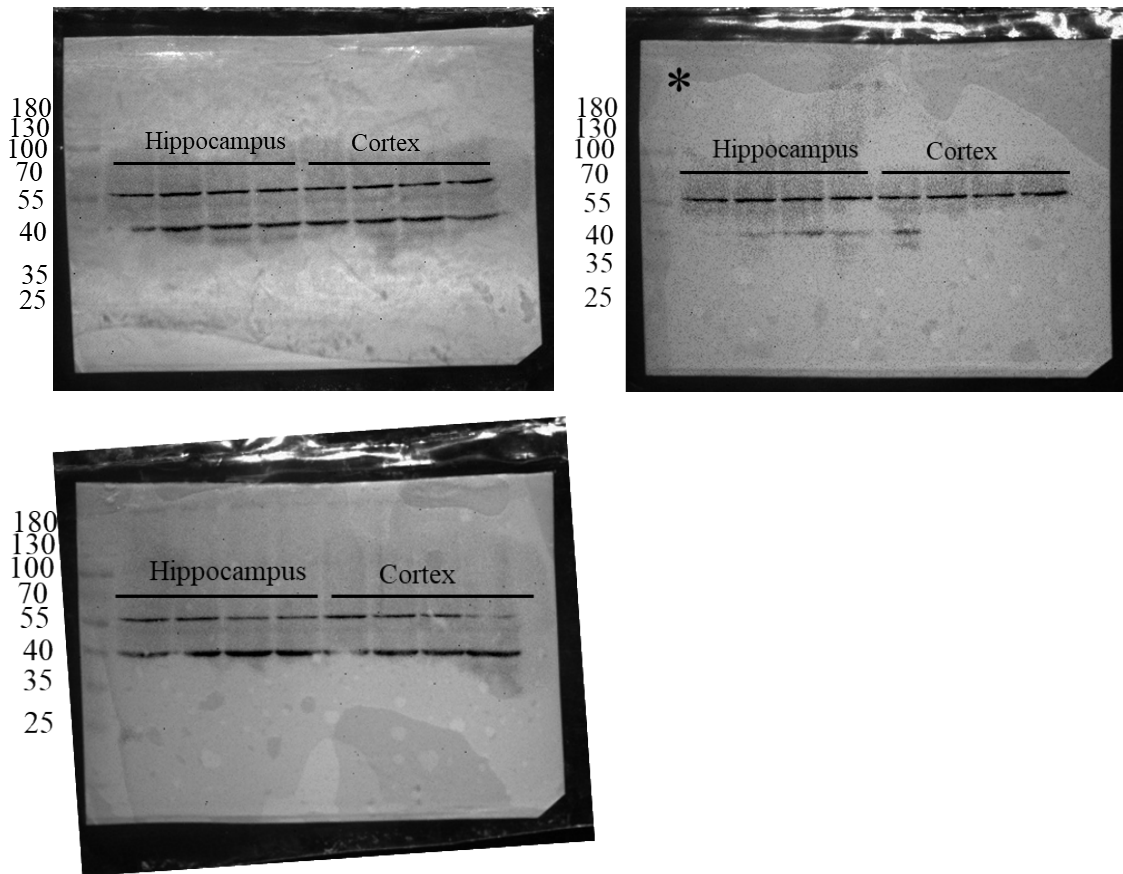

**Fig. 3** Effect of oral treatment with quercetin on the expression of BACE-1 in hippocampus and cortex of  $A\beta_{1-42}$ -exposed mouse. BACE: beta-site of APP cleaving enzyme.

**Beta actin**

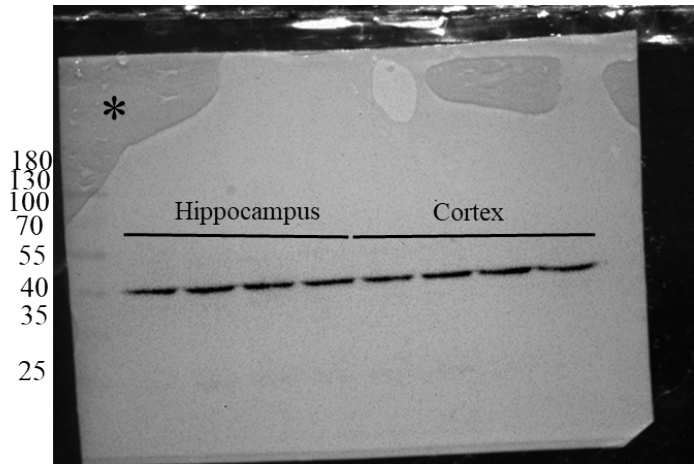

**Fig. 4** Expression of beta actin protein in the blot of Fig 3 after stripping.

**\* Representative blots used in manuscript**

## GFAP

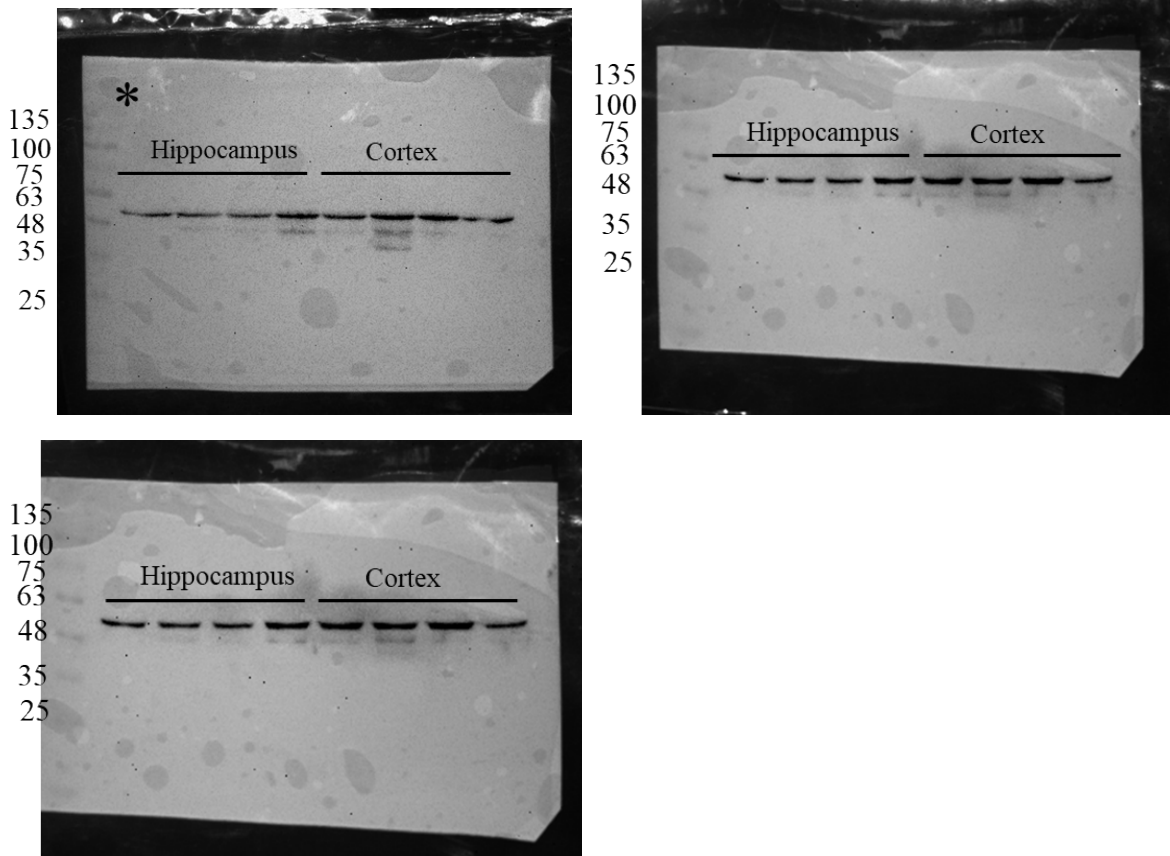

**Fig. 5** Effect of oral treatment with quercetin on the expression of GFAP in hippocampus and cortex of  $A\beta_{1-42}$ -exposed mouse. GFAP: Glial fibrillary acidic protein.

**Beta-actin**

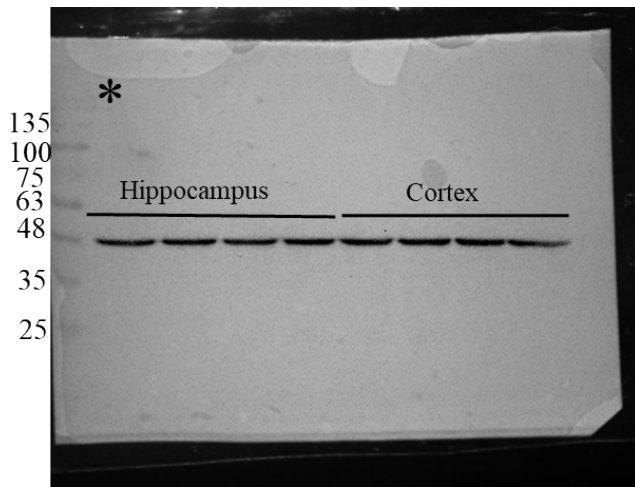

**Fig. 6** Expression of beta actin protein in the blot of Fig 5 after stripping.

**\* Representative blots used in manuscript.**

### Amyloid precursor protein

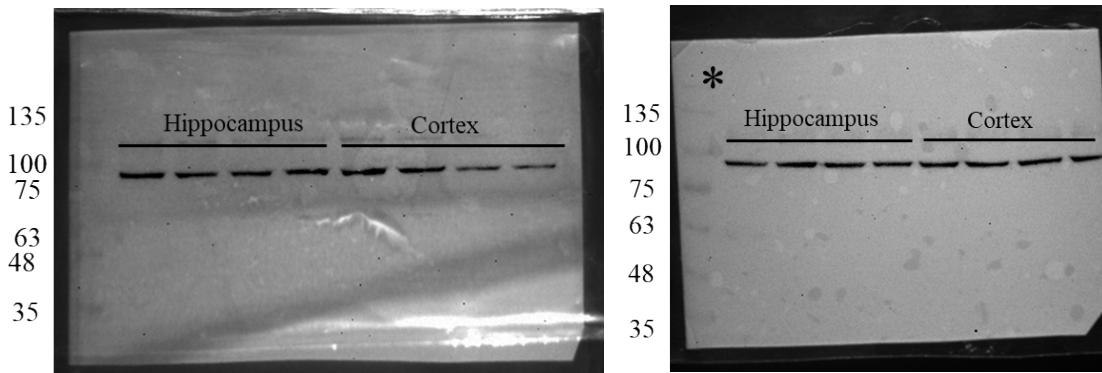

**Fig. 7** Effect of oral treatment with quercetin on the expression of APP in hippocampus and cortex of  $A\beta_{1-42}$ -exposed mouse. APP: Amyloid precursor protein.

### Beta-actin

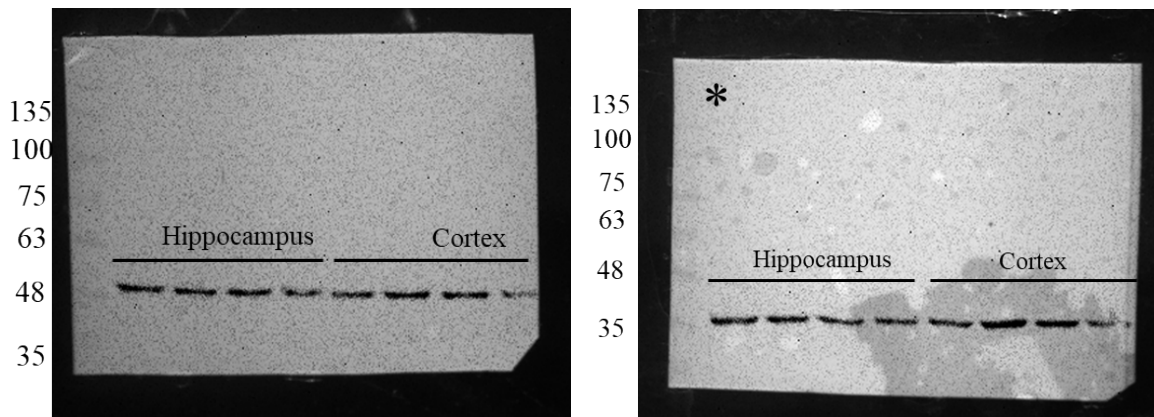

**Fig. 8** Expression of beta actin protein in the blots of Fig 7 after stripping.

**\* Representative blots used in manuscript.**
